# Supplementary material for: Speciation of americium in seawater and accumulation in the marine sponge Aplysina cavernicola
Source: Royal Society of Chemistry journal article supplement (doi:10.1039/c5dt02805a), 2015-01-01

Electronic Supplementary Information

# Speciation of americium in seawater and accumulation in marine sponge *Aplysina cavernicola*.

*Melody MALOUBIER<sup>a,b\*</sup>, Hervé MICHEL<sup>a</sup>, Olivier P. THOMAS<sup>a</sup>, Pier Lorenzo SOLARI<sup>c</sup>,  
Philippe MOISY<sup>d</sup>, Marie-Aude TRIBALAT<sup>a</sup>, Marie Yasmine Dechraoui BOTTEIN<sup>e</sup>, F.R.  
OBERHAENSLI<sup>e</sup>, Marguerite MONFORT<sup>b</sup>, Christophe MOULIN<sup>b</sup>, Christophe DEN  
AUWER<sup>a</sup>*

Content: 8 pages including cover sheet

Table S1: Thermodynamic constants for americium speciation

Table S2: Thermodynamic constants for europium speciation

Table S3: Average concentration for co-existing metal species in seawater

Figure S4: Prediction speciation diagram of europium at  $4.10^{-17}$  M in seawater (JCHESS®)

Figure S5: Prediction speciation diagram of americium at  $4.10^{-17}$  M in seawater (JCHESS®)

Figure S6: : Imaginary part of the Fourier transform of the EXAFS spectrum of the doped seawater solution at  $[Am^{3+}] = 5 \times 10^{-5}$  M. Experimental spectrum in circles, adjustment with one bidentate carbonate in dots, with one monodentate carbonate in dash dots and final adjustment in black lines.

Figure S7: Imaginary part of the Fourier transform of the EXAFS spectrum of the doped seawater solution at  $[Eu^{3+}] = 5 \times 10^{-5}$  M. Experimental spectrum in circles, adjustment with sodium in black lines and without sodium in dots.

- **Table S1:** Equilibrium constants for Am<sup>3+</sup> at I=0 used for the speciation calculation

| Equilibrium                                                                                          | Log <sub>10</sub> K° | Reference |
|------------------------------------------------------------------------------------------------------|----------------------|-----------|
| Am <sup>3+</sup> + CO <sub>3</sub> <sup>2-</sup> = AmCO <sub>3</sub> <sup>+</sup>                    | 7.80                 | [2]       |
| Am <sup>3+</sup> + 2 CO <sub>3</sub> <sup>2-</sup> = Am(CO <sub>3</sub> ) <sub>2</sub> <sup>-</sup>  | 12.3                 | [2]       |
| Am <sup>3+</sup> + 3 CO <sub>3</sub> <sup>2-</sup> = Am(CO <sub>3</sub> ) <sub>3</sub> <sup>3-</sup> | 15.2                 | [2]       |
| Am <sup>3+</sup> + H <sub>2</sub> O = AmOH <sup>2+</sup> + H <sup>+</sup>                            | -6.40                | [2]       |
| Am <sup>3+</sup> + 2 H <sub>2</sub> O = Am(OH) <sub>2</sub> <sup>+</sup> + 2H <sup>+</sup>           | -14.1                | [2]       |
| Am <sup>3+</sup> + 3 H <sub>2</sub> O = Am(OH) <sub>3</sub> (aq) + 3H <sup>+</sup>                   | -25.7                | [2]       |
| Am <sup>3+</sup> + NO <sub>3</sub> <sup>-</sup> = AmNO <sub>3</sub> <sup>2+</sup>                    | 1.33                 | [2]       |
| Am <sup>3+</sup> + SO <sub>4</sub> <sup>2-</sup> = AmSO <sub>4</sub> <sup>+</sup>                    | 3.85                 | [2]       |
| Am <sup>3+</sup> + 2 SO <sub>4</sub> <sup>2-</sup> = Am(SO <sub>4</sub> ) <sub>2</sub> <sup>-</sup>  | 5.40                 | [2]       |
| Am <sup>3+</sup> + Cl <sup>-</sup> = AmCl <sup>2+</sup>                                              | 1.05                 | [2]       |
| Am <sup>3+</sup> + F <sup>-</sup> = AmF <sup>2+</sup>                                                | 3.40                 | [2]       |
| Am <sup>3+</sup> + 2F <sup>-</sup> = AmF <sub>2</sub> <sup>+</sup>                                   | 5.80                 | [2]       |

- **Table S2:** Equilibrium constants for Eu<sup>3+</sup> at I=0 used for the speciation calculation

| Equilibrium                                                                                                             | Log <sub>10</sub> K° | Reference |
|-------------------------------------------------------------------------------------------------------------------------|----------------------|-----------|
| Eu <sup>3+</sup> + HCO <sub>3</sub> <sup>-</sup> = EuCO <sub>3</sub> <sup>+</sup> + H <sup>+</sup>                      | -2.41                | [40-41]   |
| Eu <sup>3+</sup> + 2 HCO <sub>3</sub> <sup>-</sup> = Eu(CO <sub>3</sub> ) <sub>2</sub> <sup>-</sup> + 2H <sup>+</sup>   | -8.40                | [40-41]   |
| Eu <sup>3+</sup> + 3 HCO <sub>3</sub> <sup>-</sup> = Eu(CO <sub>3</sub> ) <sub>3</sub> <sup>3-</sup> + 3 H <sup>+</sup> | -16.8                | [40-41]   |
| Eu <sup>3+</sup> + H <sub>2</sub> O = EuOH <sup>2+</sup> + H <sup>+</sup>                                               | -7.91                | [40-41]   |
| Eu <sup>3+</sup> + 2 H <sub>2</sub> O = Eu(OH) <sub>2</sub> <sup>+</sup> + 2H <sup>+</sup>                              | -14.9                | [40-41]   |
| Eu <sup>3+</sup> + 3 H <sub>2</sub> O = Eu(OH) <sub>3</sub> (aq) + 3H <sup>+</sup>                                      | -24.1                | [40-41]   |
| Eu <sup>3+</sup> + NO <sub>3</sub> <sup>-</sup> = EuNO <sub>3</sub> <sup>2+</sup>                                       | 0.875                | [40-41]   |
| Eu <sup>3+</sup> + SO <sub>4</sub> <sup>2-</sup> = EuSO <sub>4</sub> <sup>+</sup>                                       | 3.64                 | [40-41]   |
| Eu <sup>3+</sup> + 2 SO <sub>4</sub> <sup>2-</sup> = Eu(SO <sub>4</sub> ) <sub>2</sub> <sup>-</sup>                     | 5.47                 | [40-41]   |
| Eu <sup>3+</sup> + Cl <sup>-</sup> = EuCl <sup>2+</sup>                                                                 | 0.309                | [40-41]   |
| Eu <sup>3+</sup> + F <sup>-</sup> = EuF <sup>2+</sup>                                                                   | 4.44                 | [40-41]   |
| Eu <sup>3+</sup> + 2F <sup>-</sup> = EuF <sub>2</sub> <sup>+</sup>                                                      | 7.71                 | [40-41]   |

- **Table S3:** Average concentration for co-existing metal and other species in seawater

| Metal | Concentration (nM)   | Reference  |
|-------|----------------------|------------|
| Zn    | 8.1                  | [41,43]    |
| Cu    | 3.3                  | [41-43]    |
| Fe    | 2.7                  | [41]       |
| Co    | 0.11                 | [45]       |
| Pb    | 0.17                 | [46]       |
| Cd    | 1.0                  | [41-42,48] |
| Ni    | 11                   | [42,48]    |
| Hg    | 8.5 10 <sup>-3</sup> | [49-50]    |
| Al    | 38                   | [51]       |
| I     | 500                  | [47]       |
| B     | 0.4 mM               | [44]       |

- **Figure S4:** Prediction speciation diagram of europium at  $4.10^{-17}$  M in seawater (JCHESS®)

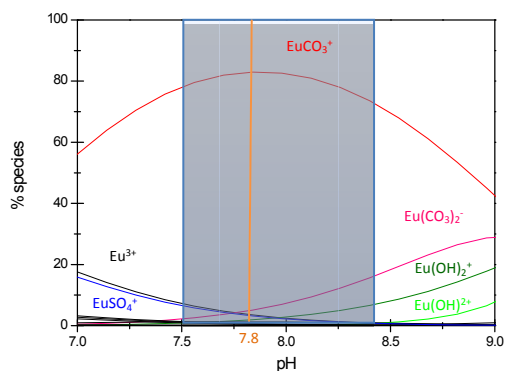

- **Figure S5:** Prediction speciation diagram of americium at  $4.10^{-17}$  M in seawater (JCHESS®)

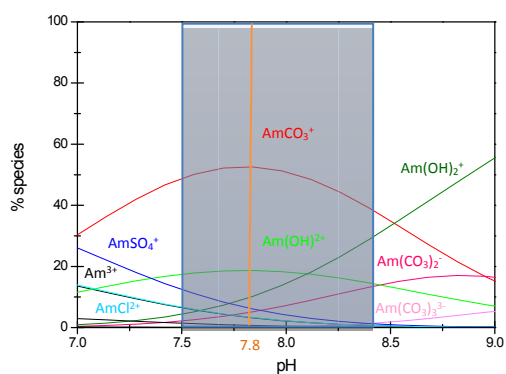

- **Figure S6:** Imaginary part of the Fourier transform of the EXAFS spectrum of the doped seawater solution at  $[Am^{3+}] = 5 \times 10^{-5}$  M. Experimental spectrum in circles, adjustment with one bidentate carbonate in dots, with one monodentate carbonate in dash dots and final adjustment in black lines.

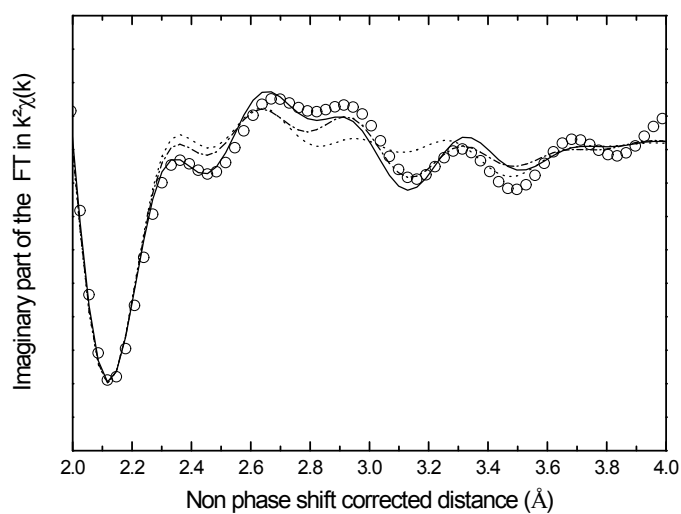

- **Figure S7:** Imaginary part of the Fourier transform of the EXAFS spectrum of the doped seawater solution at  $[\text{Eu}^{3+}] = 5 \times 10^{-5} \text{ M}$ . Experimental spectrum in circles, adjustment with sodium in black lines and without sodium in dots.

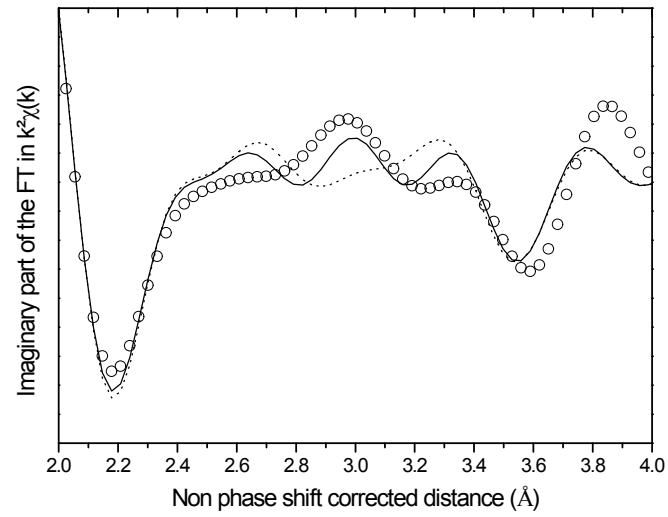

Supplement: c5dt02805a1.pdf [file c5dt02805a1.pdf]
